# Supplementary material
Source: PubMed Central journal article supplement (PMC4622382)
Supplement: DS_10.1177_1941738115607445.pdf [file DS_10.1177_1941738115607445.pdf]

**Table 1.** Data Extraction of Included Studies

| Author                        | FMS Cut Score | Significance Between FMS Scores of Injured and Uninjured                                        | ROC Conducted | AUC                                                                             | Sensitivity and Specificity                                                                              | Odds Ratios (95% CI) | Predictive Values                                    | RR                                          | Likelihood Ratios (95% CI)                    |
|-------------------------------|---------------|-------------------------------------------------------------------------------------------------|---------------|---------------------------------------------------------------------------------|----------------------------------------------------------------------------------------------------------|----------------------|------------------------------------------------------|---------------------------------------------|-----------------------------------------------|
| Kiesel et al <sup>14</sup>    | 14            | Yes, significant difference between mean FMS scores of injured and uninjured ( $P < 0.05$ )     | Yes           | Unreported                                                                      | S = 0.54<br>Sp = 0.91                                                                                    | 11.67 (2.47-54.52)   | PV+ = 0.7<br>PV- = 0.83<br>(calculated by B. Dorrel) | Unreported                                  | + = 5.92 (1.97-18.37)<br>- = 0.51 (0.34-0.97) |
| Kiesel et al <sup>15</sup>    | 14 $\leq$     | Yes, mean score for injured vs uninjured ( $P = 0.02$ )                                         | No            | Unreported                                                                      | S = 0.26<br>Sp = 0.87                                                                                    | Unreported           | Unreported                                           | 1.87 (95% CI, 1.20-2.96)                    | Unreported                                    |
| Chorba et al <sup>1</sup>     | $\leq 14$     | Yes, those with FMS score of $\leq 14$ more likely to sustain injury ( $P = 0.0496$ )           | No            | Unreported                                                                      | S = 0.57<br>Sp = 0.737                                                                                   | 3.850 (0.980-15.130) | Unreported                                           | Unreported                                  | + 2.200 (0.945-5.119)<br>- = Unreported       |
| Peate et al <sup>11</sup>     | 16 <          | No significant correlation between injuries and FMS score                                       | No            | Unreported                                                                      | Unreported                                                                                               | Unreported           | Unreported                                           | Unreported                                  | Unreported                                    |
| Butler et al <sup>7</sup>     | $\leq 14$     | No                                                                                              | Yes           | Unreported                                                                      | S = 0.83<br>Sp = 0.62                                                                                    | 8.31                 | PV+ = 0.85<br>PV- = 0.58                             | Unreported                                  | + = 2.20<br>- = 0.26                          |
| O'Connor et al <sup>8</sup>   | $\leq 14$     | Yes, both study groups of short cohort (SC) ( $P < 0.01$ ) and long cohorts (LC) ( $P = 0.03$ ) | Yes           | AUC Any injury = 0.58<br>AUC Overuse injury = 0.52<br>AUC Serious injury = 0.53 | Any Injury: S = 0.45;<br>Sp = 0.78<br>Overuse: S = 0.12;<br>Sp = 0.90<br>Serious: S = 0.11;<br>Sp = 0.93 | 2.0 (1.3-3.1)        | Unreported                                           | SC = 1.91<br>LC = 1.65<br>Combined OR = 1.5 | Unreported                                    |
| Shojaedin et al <sup>11</sup> | 17            | Yes ( $P = 0.005$ )                                                                             | Yes           | Unreported                                                                      | S = 0.645<br>Sp = 0.780                                                                                  | 4.70                 | Unreported                                           | Unreported                                  | + = 2.46<br>- = 0.621                         |

*AUC, area under the curve; FMS, Functional Movement Screen; PV, predictive value; ROC, receiver operating characteristic; S, sensitivity; Sp, specificity;*
